# Supplementary material for: Effects of the integrated Community Case Management of Childhood Illness Strategy on Child Mortality in Ethiopia: A Cluster Randomized Trial
Source: PubMed Central journal article supplement (PMC4775896; doi:10.4269/ajtmh.15-0586), 2016-03-02
Supplement: SD8.pdf [file SD8.pdf]

SUPPLEMENTAL WEB ANNEX

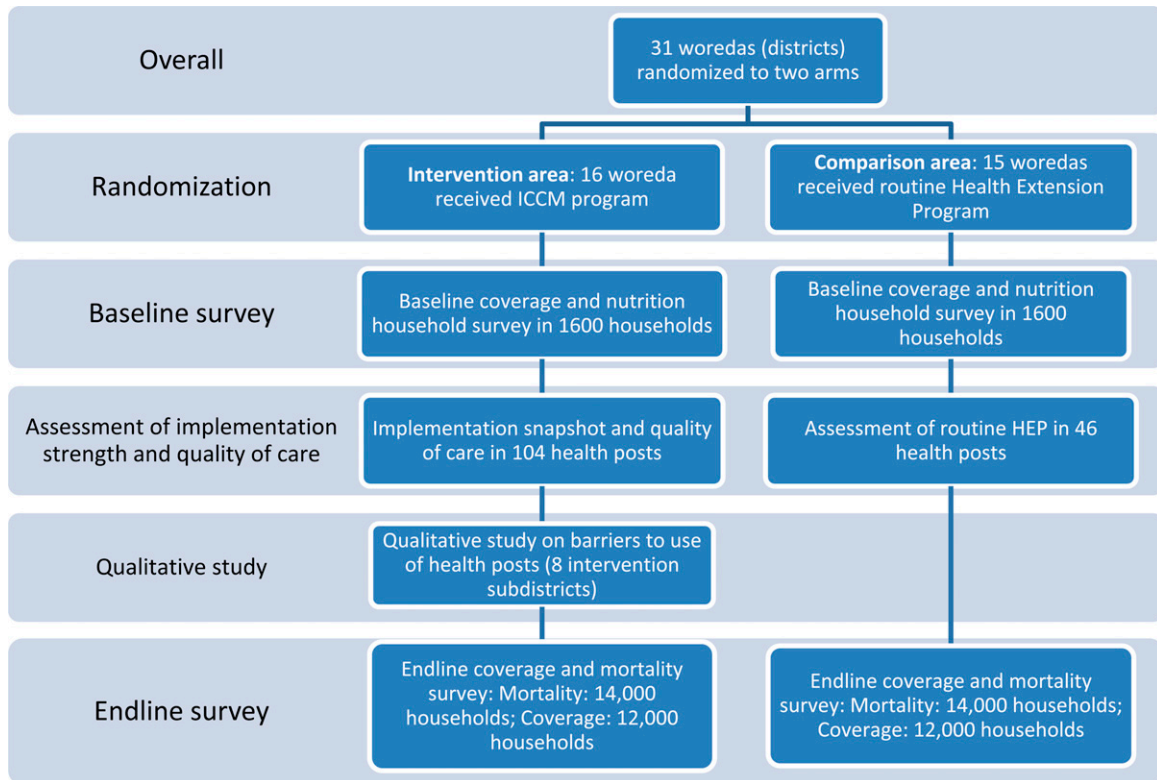

SUPPLEMENTAL FIGURE 1. Trial design.

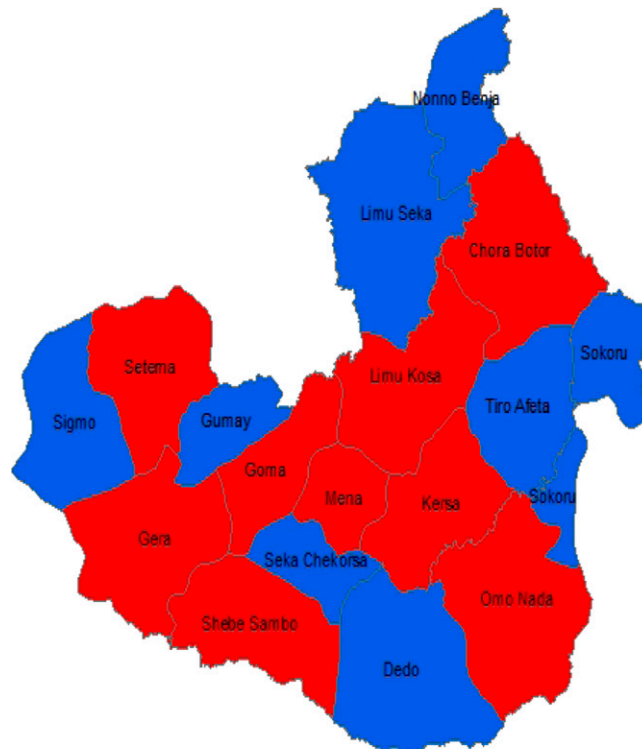

*Note: Blue = Comparison, Red = Intervention*

SUPPLEMENTAL FIGURE 2. Intervention and comparison woredas in Jimma zone.

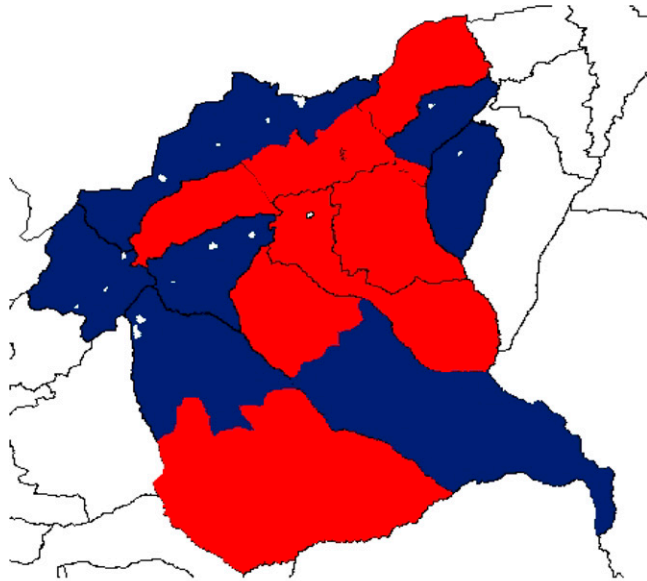

*Note: Blue = Comparison, Red = Intervention*

SUPPLEMENTAL FIGURE 3. Intervention and comparison woredas in West Hararghe zone.

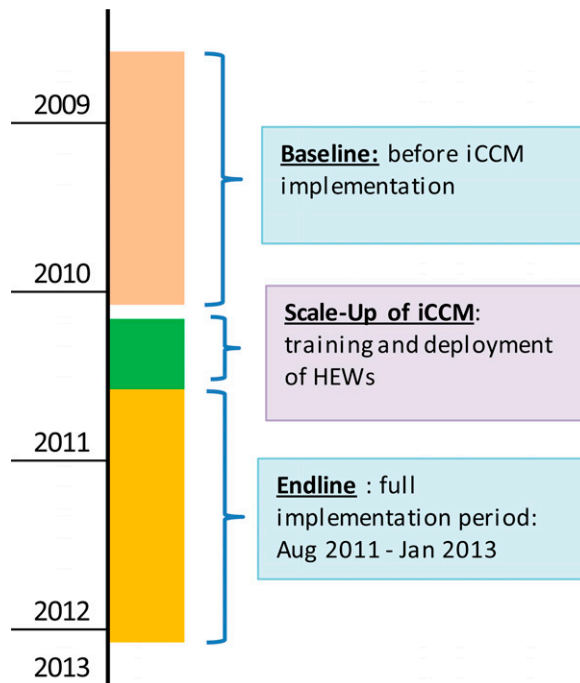

SUPPLEMENTAL FIGURE 4. Measurement period for mortality.

SUPPLEMENTAL TABLE 1

Comparison between intervention and comparison areas in terms of case management guidelines and program inputs for the Ethiopia iCCM program vs. routine HEP

| Management of iCCM illnesses for children 2-59 months                                            | iCCM (intervention areas)                                                                                                                                             | Routine HEP (comparison areas)                                                                                |
|--------------------------------------------------------------------------------------------------|-----------------------------------------------------------------------------------------------------------------------------------------------------------------------|---------------------------------------------------------------------------------------------------------------|
| Pneumonia                                                                                        | Antibiotics (cotrimoxazole)                                                                                                                                           | Referral to health center                                                                                     |
| Severe pneumonia                                                                                 | Prereferral treatment with antibiotics<br>Referral to health center                                                                                                   | Referral to health center                                                                                     |
| Diarrhea (some dehydration, no dehydration)                                                      | ORS/ORT<br>Zinc                                                                                                                                                       | ORS/ORT                                                                                                       |
| Severe diarrhea (severe dehydration, persistent diarrhea, severe persistent diarrhea, dysentery) | ORS<br>Vitamin A (for persistent and severe persistent diarrhea only)<br>Referral to health center                                                                    | ORS<br>Vitamin A (for persistent and severe persistent diarrhea only)<br>Referral to health center            |
| Malaria                                                                                          | Antimalarial (ACT after positive RDT)                                                                                                                                 | Antimalarial (ACT after positive RDT)                                                                         |
| Severe febrile disease                                                                           | Pre-referral treatment with antibiotics<br>Referral to health center                                                                                                  | Referral to health center                                                                                     |
| Uncomplicated malnutrition                                                                       | Ready to use therapeutic food (RUTF) or supplementary feeding program                                                                                                 | RUTF or supplementary feeding program                                                                         |
| Severe complicated malnutrition                                                                  | Pre-referral treatment with amoxicillin and vitamin A<br>Referral to health center                                                                                    | Pre-referral treatment with amoxicillin and vitamin A<br>Referral to health center                            |
| Measles                                                                                          | Vitamin A                                                                                                                                                             | Vitamin A                                                                                                     |
| Severe complicated measles                                                                       | Vitamin A<br>Antibiotics (cotrimoxazole)<br>Tetracycline eye ointment (optional)<br>Referral to health center                                                         | Vitamin A<br>Antibiotics (cotrimoxazole)<br>Tetracycline eye ointment (optional)<br>Referral to health center |
| Measles with eye or mouth complications                                                          | Vitamin A<br>Tetracycline eye ointment (optional)<br>Gentian violet (optional)                                                                                        | Vitamin A<br>Tetracycline eye ointment (optional)<br>Gentian violet (optional)                                |
| Acute ear infection                                                                              | Paracetamol<br>Referral to health center                                                                                                                              | Paracetamol<br>Referral to health center                                                                      |
| Anemia                                                                                           | Referral to health center                                                                                                                                             | Referral to health center                                                                                     |
| Program inputs                                                                                   |                                                                                                                                                                       |                                                                                                               |
| Training of HEWs                                                                                 | 6-day training on iCCM                                                                                                                                                | No additional training                                                                                        |
| Supervision                                                                                      | Standardized supportive supervision on iCCM supported by partner NGOs plus standard government supervision<br>Biannual PRCM meetings                                  | Standard government supervision                                                                               |
| Supply of commodities                                                                            | Support for purchase and supply of drugs and other commodities by UNICEF and partners<br>Provision of iCCM registers, iCCM chart booklets, timers, and other supplies | Standard government commodity supply chain system<br>No additional supplies or job aids                       |
| Monitoring and evaluation                                                                        | Enhanced data collection during supervisions and PRCM meetings<br>Data management support by UNICEF                                                                   | Standard government monitoring and evaluation                                                                 |

ACT = artemisinin-based combination therapy; HEP = Health Extension Program; iCCM = integrated community case management; ORS = oral rehydration salts; ORT = oral rehydration therapy; PRCM = performance review and clinical mentoring; RDT = rapid diagnostic test; RTUF = ready-to-use therapeutic foods; UNICEF = United Nations Children's Fund.

SUPPLEMENTAL TABLE 2  
Sample size calculation for the endline survey

| Line no. | U5MR                                                               |         |                                                                                                                                                             |
|----------|--------------------------------------------------------------------|---------|-------------------------------------------------------------------------------------------------------------------------------------------------------------|
| 1        | Year 2000                                                          | 0.135   | DHS 2005 (10-year rate)                                                                                                                                     |
| 2        | Year 2005                                                          | 0.114   | DHS 2010 (10-year rate)                                                                                                                                     |
| 3        | Annual rate of change                                              | -3.32%  |                                                                                                                                                             |
| 4        | Corresponding rate of change for 18 months                         | -4.93%  | Mortality rate at 18 months assumed equal to average rates at 12 and 24 months (using formula $0.5(r+1)(r+2) - 1$ , where $r$ is the annual rate of change) |
| 5        | Rural U5MR in 2005                                                 | 0.114   | From DHS 2005 (10-year mortality rate)                                                                                                                      |
| 6        | Rural U5MR in 2010                                                 | 0.096   | Estimated assuming annual rate of change in line 3                                                                                                          |
| 7        | Total number of households                                         |         |                                                                                                                                                             |
| 8        | Intervention                                                       | 556,366 |                                                                                                                                                             |
| 9        | Control                                                            | 483,893 |                                                                                                                                                             |
| 10       | Baseline U5MR                                                      |         |                                                                                                                                                             |
| 11       | Phase I area                                                       | 0.096   | From line 6 above                                                                                                                                           |
| 12       | Phase II area                                                      | 0.096   |                                                                                                                                                             |
| 13       | Endline U5MR                                                       |         |                                                                                                                                                             |
| 14       | Phase I area (intervention areas)                                  | 71.303  | Assumed 21% decline above the secular trends (-25.93%)                                                                                                      |
| 15       | Phase II area (comparison areas)                                   | 91.519  | Assumed secular trends at national rate of change (-4.93%)                                                                                                  |
| 16       | Assumptions                                                        |         |                                                                                                                                                             |
| 17       | Power                                                              | 0.8     |                                                                                                                                                             |
| 18       | Alpha                                                              | 0.05    |                                                                                                                                                             |
| 19       | Design effect                                                      | 1.2     | From DHS 2010 (Oromia region)                                                                                                                               |
| 20       | Crude birth rate                                                   | 0.036   |                                                                                                                                                             |
| 21       | Household size                                                     | 5       |                                                                                                                                                             |
| 22       | Non response rate                                                  | 0.05    |                                                                                                                                                             |
| 23       | Two sided test; conservative approach assuming independent samples |         |                                                                                                                                                             |
| 24       | Sample size of births                                              | 2,969   | Using STATA sampsi command comparing intervention and comparison at endline                                                                                 |
| 25       | Corresponding number of households                                 | 13,890  |                                                                                                                                                             |
| 26       | Total sample of households in the two arms                         | 27,780  | Rounded to 28,000 households                                                                                                                                |

DHS = demographic and health surveys.

SUPPLEMENTAL TABLE 3

Percentage of children under five and children aged 2–59 months who had pneumonia, fever, or diarrhea in the 2 weeks preceding the baseline and endline surveys and percentage for whom care was sought from a formal provider, by study group

| Indicator                         | Intervention |         |            |                | Comparison |         |            |                | <i>P</i> value of difference in differences |
|-----------------------------------|--------------|---------|------------|----------------|------------|---------|------------|----------------|---------------------------------------------|
|                                   | Baseline     | Endline | Difference | <i>P</i> value | Baseline   | Endline | Difference | <i>P</i> value |                                             |
| Careseeking from formal provider* |              |         |            |                |            |         |            |                |                                             |
| Children aged 0–59 months         |              |         |            |                |            |         |            |                |                                             |
| Pneumonia                         | 28.3         | 39.4    | 11.0       | 0.1178         | 27.2       | 39.6    | 12.4       | 0.0715         | 0.8630                                      |
| Fever                             | 20.9         | 25.1    | 4.2        | 0.3043         | 24.9       | 29.4    | 4.5        | 0.2089         | 0.7960                                      |
| Diarrhea                          | 20.8         | 21.5    | 0.7        | 0.8188         | 15.3       | 23.6    | 8.3        | 0.0478         | 0.3130                                      |
| At least one illness              | 22.9         | 25.7    | 2.8        | 0.4233         | 23.3       | 29.3    | 5.9        | 0.0545         | 0.7680                                      |
| Children aged 2–59 months         |              |         |            |                |            |         |            |                |                                             |
| Pneumonia                         | 28.8         | 41.1    | 12.3       | 0.0850         | 27.4       | 39.9    | 12.4       | 0.0722         | 0.8410                                      |
| Fever                             | 21.2         | 25.3    | 4.1        | 0.3147         | 25.1       | 29.5    | 4.4        | 0.2257         | 0.7800                                      |
| Diarrhea                          | 21.2         | 21.7    | 0.5        | 0.8807         | 15.2       | 23.7    | 8.4        | 0.0481         | 0.2850                                      |
| At least one illness              | 23.4         | 26.0    | 2.6        | 0.4417         | 23.6       | 29.5    | 5.9        | 0.0594         | 0.7710                                      |

\*Formal care providers include public and private health facilities, including health posts.

SUPPLEMENTAL TABLE 4

Percentage of children, by study group at baseline and endline, under five and children aged 2–59 months with pneumonia, fever, and diarrhea for whom care was sought, by type of care provider

| Indicator                                   | Intervention |         |            |                | Comparison |         |            |                | <i>P</i> value of difference in differences |
|---------------------------------------------|--------------|---------|------------|----------------|------------|---------|------------|----------------|---------------------------------------------|
|                                             | Baseline     | Endline | Difference | <i>P</i> value | Baseline   | Endline | Difference | <i>P</i> value |                                             |
| Careseeking to HEW                          |              |         |            |                |            |         |            |                |                                             |
| Children aged 0–59 months                   |              |         |            |                |            |         |            |                |                                             |
| Pneumonia                                   | 4.9          | 11.5    | 6.6        | 0.0174         | 4.3        | 9.6     | 5.4        | 0.1208         | 0.4560                                      |
| Fever                                       | 3.8          | 8.4     | 4.7        | 0.0169         | 2.4        | 6.3     | 3.9        | 0.0088         | 0.7120                                      |
| Diarrhea                                    | 6.1          | 9.8     | 3.7        | 0.2074         | 3.3        | 8.5     | 5.1        | 0.0090         | 0.6240                                      |
| At least one illness                        | 5.0          | 9.2     | 4.3        | 0.0256         | 3.5        | 7.7     | 4.2        | 0.0146         | 0.6430                                      |
| Children aged 2–59 months                   |              |         |            |                |            |         |            |                |                                             |
| Pneumonia                                   | 5.1          | 11.5    | 6.4        | 0.0211         | 4.3        | 9.7     | 5.4        | 0.1185         | 0.4410                                      |
| Fever                                       | 3.9          | 8.5     | 4.6        | 0.0197         | 2.5        | 6.4     | 3.9        | 0.0086         | 0.7130                                      |
| Diarrhea                                    | 6.2          | 9.9     | 3.7        | 0.2200         | 3.4        | 8.3     | 5.0        | 0.0098         | 0.6580                                      |
| At least one illness                        | 5.1          | 9.3     | 4.2        | 0.0313         | 3.6        | 7.7     | 4.1        | 0.0149         | 0.6560                                      |
| Careseeking to other public health facility |              |         |            |                |            |         |            |                |                                             |
| Children aged 0–59 months                   |              |         |            |                |            |         |            |                |                                             |
| Pneumonia                                   | 13.8         | 23.6    | 9.8        | 0.1252         | 11.0       | 24.5    | 13.5       | 0.0145         | 0.5300                                      |
| Fever                                       | 9.7          | 12.7    | 3.0        | 0.2888         | 13.0       | 16.3    | 3.3        | 0.3311         | 0.9540                                      |
| Diarrhea                                    | 7.5          | 10.1    | 2.6        | 0.3310         | 7.2        | 11.0    | 3.7        | 0.0670         | 0.8900                                      |
| At least one illness                        | 10.2         | 13.1    | 2.9        | 0.2907         | 11.3       | 15.6    | 4.3        | 0.0896         | 0.9220                                      |
| Children aged 2–59 months                   |              |         |            |                |            |         |            |                |                                             |
| Pneumonia                                   | 14.1         | 25.3    | 11.2       | 0.1000         | 11.0       | 24.7    | 13.7       | 0.0132         | 0.5360                                      |
| Fever                                       | 9.9          | 12.8    | 2.9        | 0.3216         | 13.1       | 16.3    | 3.2        | 0.3454         | 0.9560                                      |
| Diarrhea                                    | 7.7          | 10.2    | 2.4        | 0.3674         | 7.1        | 11.1    | 4.0        | 0.0550         | 0.8000                                      |
| At least one illness                        | 10.4         | 13.3    | 2.8        | 0.3071         | 11.4       | 15.7    | 4.3        | 0.0882         | 0.9130                                      |
| Careseeking to private health facility      |              |         |            |                |            |         |            |                |                                             |
| Children aged 0–59 months                   |              |         |            |                |            |         |            |                |                                             |
| Pneumonia                                   | 12.6         | 6.5     | –6.2       | 0.1326         | 13.6       | 9.7     | –3.9       | 0.3081         | 0.7470                                      |
| Fever                                       | 9.5          | 5.3     | –4.2       | 0.1415         | 10.6       | 8.3     | –2.3       | 0.3426         | 0.8120                                      |
| Diarrhea                                    | 8.1          | 2.6     | –5.5       | 0.0264         | 5.7        | 5.4     | –0.3       | 0.9169         | 0.1250                                      |
| At least one illness                        | 10.1         | 4.8     | –5.3       | 0.0308         | 9.9        | 7.8     | –2.1       | 0.3160         | 0.3670                                      |
| Children aged 2–59 months                   |              |         |            |                |            |         |            |                |                                             |
| Pneumonia                                   | 12.7         | 6.7     | –6.0       | 0.1463         | 13.8       | 9.7     | –4.1       | 0.2875         | 0.7600                                      |
| Fever                                       | 9.5          | 5.4     | –4.1       | 0.1361         | 10.7       | 8.4     | –2.3       | 0.3258         | 0.8440                                      |
| Diarrhea                                    | 8.2          | 2.6     | –5.6       | 0.0247         | 5.8        | 5.5     | –0.3       | 0.9126         | 0.1210                                      |
| At least one illness                        | 10.1         | 4.8     | –5.3       | 0.0283         | 10.1       | 7.9     | –2.1       | 0.3217         | 0.3640                                      |
| Careseeking from informal sources           |              |         |            |                |            |         |            |                |                                             |
| Children aged 0–59 months                   |              |         |            |                |            |         |            |                |                                             |
| Pneumonia                                   | 12.7         | 0.2     | –12.5      | 0.0020         | 7.0        | 4.1     | –2.9       | 0.2083         | 0.0150                                      |
| Fever                                       | 13.9         | 0.6     | –13.3      | 0.0003         | 9.8        | 2.9     | –6.9       | 0.0146         | 0.0300                                      |
| Diarrhea                                    | 10.3         | 2.5     | –7.8       | 0.0095         | 9.8        | 3.7     | –6.1       | 0.0323         | 0.2430                                      |
| At least one illness                        | 14.3         | 1.2     | –13.1      | 0.0081         | 11.3       | 3.9     | –7.4       | 0.0002         | 0.0220                                      |
| Children aged 2–59 months                   |              |         |            |                |            |         |            |                |                                             |
| Pneumonia                                   | 13.3         | 0.2     | –13.1      | 0.0026         | 7.3        | 4.1     | –3.2       | 0.1883         | 0.0150                                      |
| Fever                                       | 13.7         | 0.6     | –13.1      | 0.0004         | 10.1       | 2.9     | –7.2       | 0.0137         | 0.0340                                      |
| Diarrhea                                    | 10.3         | 2.5     | –7.8       | 0.0094         | 10.0       | 3.8     | –6.3       | 0.0306         | 0.2430                                      |
| At least one illness                        | 14.2         | 1.2     | –13.1      | 0.0003         | 11.6       | 4.0     | –7.7       | 0.0076         | 0.0240                                      |

HEW = health extension worker. Percentage based on woreda averages.

SUPPLEMENTAL TABLE 5

Percentage of children under five and children aged 2–59 months with pneumonia, fever, and diarrhea in the 2 weeks preceding the baseline and endline surveys who received the recommended drug treatment, by type of illness and study group

| Indicator                                                           | Intervention |         |            |                | Comparison |         |            |                | <i>P</i> value of difference in differences |
|---------------------------------------------------------------------|--------------|---------|------------|----------------|------------|---------|------------|----------------|---------------------------------------------|
|                                                                     | Baseline     | Endline | Difference | <i>P</i> value | Baseline   | Endline | Difference | <i>P</i> value |                                             |
| Treatment with recommended drug                                     |              |         |            |                |            |         |            |                |                                             |
| Children aged 0–59 months                                           |              |         |            |                |            |         |            |                |                                             |
| Antibiotics for pneumonia                                           | 30.5         | 17.2    | –13.3      | 0.0267         | 26.1       | 24.1    | –2.0       | 0.7366         | 0.4070                                      |
| Antimalarial for fever                                              | 3.7          | 2.9     | –0.8       | 0.5384         | 4.5        | 4.8     | 0.3        | 0.8271         | 0.3870                                      |
| ORS for diarrhea                                                    | 14.7         | 17.6    | 2.9        | 0.4288         | 9.1        | 17.2    | 8.1        | 0.0012         | 0.3350                                      |
| ORS + zinc for diarrhea                                             | 0.4          | 1.0     | 0.6        | 0.4761         | 0.0        | 0.6     | 0.6        | 0.3259         | N/A                                         |
| Combined                                                            | 18.9         | 12.7    | –6.2       | 0.0228         | 17.6       | 16.4    | –1.1       | 0.6307         | 0.3210                                      |
| Children aged 2–59 months                                           |              |         |            |                |            |         |            |                |                                             |
| Antibiotics for pneumonia                                           | 31.0         | 17.7    | –13.4      | 0.0296         | 26.8       | 24.3    | –2.6       | 0.6783         | 0.4140                                      |
| Antimalarial for fever                                              | 3.8          | 2.9     | –0.8       | 0.5139         | 4.6        | 4.8     | 0.3        | 0.8373         | 0.3890                                      |
| ORS for diarrhea                                                    | 15.0         | 17.7    | 2.7        | 0.4597         | 9.0        | 17.2    | 8.2        | 0.0012         | 0.2960                                      |
| ORS + zinc for diarrhea                                             | 0.4          | 1.0     | 0.6        | 0.4761         | 0.0        | 0.6     | 0.6        | 0.3259         | N/A                                         |
| Combined                                                            | 19.5         | 12.8    | –6.6       | 0.0183         | 17.9       | 16.5    | –1.4       | 0.5579         | 0.3130                                      |
| Treatment with recommended drug within 24 hours of onset of illness |              |         |            |                |            |         |            |                |                                             |
| Children 0–59 months                                                |              |         |            |                |            |         |            |                |                                             |
| Pneumonia                                                           | 15.3         | 5.6     | –9.7       | 0.0295         | 11.9       | 8.0     | –3.9       | 0.1402         | 0.4190                                      |
| Fever                                                               | 1.0          | 1.7     | 0.7        | 0.3436         | 1.7        | 1.3     | –0.4       | 0.5736         | 0.2830                                      |
| Children 2–59 months                                                |              |         |            |                |            |         |            |                |                                             |
| Pneumonia                                                           | 15.4         | 5.6     | –9.8       | 0.0267         | 12.3       | 8.2     | –4.1       | 0.1145         | 0.3890                                      |
| Fever                                                               | 1.1          | 1.8     | 0.7        | 0.3844         | 1.8        | 1.3     | –0.4       | 0.5799         | 0.2810                                      |

ORS = oral rehydration salts. Percentage based on woreda averages; N/A = difference in differences model did not converge.

SUPPLEMENTAL TABLE 6

Percentage of children under five and aged 2–59 months with pneumonia, fever, and diarrhea who were treated with the recommended drug, by type of treatment provider at baseline and endline, by study group

| Indicator                                   | Intervention |         |            |                | Comparison |         |            |                | <i>P</i> value of difference in differences |
|---------------------------------------------|--------------|---------|------------|----------------|------------|---------|------------|----------------|---------------------------------------------|
|                                             | Baseline     | Endline | Difference | <i>P</i> value | Baseline   | Endline | Difference | <i>P</i> value |                                             |
| Treatment from HEW                          |              |         |            |                |            |         |            |                |                                             |
| Children aged 0–59 months                   |              |         |            |                |            |         |            |                |                                             |
| Antibiotics for pneumonia                   | 2.1          | 5.2     | 3.1        | 0.1666         | 1.1        | 1.0     | –0.1       | 0.9569         | 0.1420                                      |
| Antimalarial for fever                      | 0.8          | 0.9     | 0.0        | 0.9562         | 1.9        | 0.4     | –1.5       | 0.0581         | 0.1590                                      |
| ORS for diarrhea                            | 5.2          | 8.2     | 2.9        | 0.2964         | 1.6        | 5.3     | 3.7        | 0.0026         | 0.3400                                      |
| Combined                                    | 3.3          | 5.4     | 2.1        | 0.1509         | 2.4        | 3.0     | 0.6        | 0.4761         | 0.6360                                      |
| Children aged 2–59 months                   |              |         |            |                |            |         |            |                |                                             |
| Antibiotics for pneumonia                   | 2.1          | 5.2     | 3.1        | 0.1698         | 1.1        | 1.0     | –0.1       | 0.9328         | 0.1400                                      |
| Antimalarial for fever                      | 0.9          | 0.9     | 0.0        | 0.9902         | 1.9        | 0.4     | –1.5       | 0.0581         | 0.1580                                      |
| ORS for diarrhea                            | 5.3          | 8.3     | 2.9        | 0.2999         | 1.7        | 5.2     | 3.5        | 0.0026         | 0.3730                                      |
| Combined                                    | 3.4          | 5.4     | 2.0        | 0.1738         | 2.5        | 2.9     | 0.5        | 0.5723         | 0.5930                                      |
| Treatment from other public health facility |              |         |            |                |            |         |            |                |                                             |
| Children aged 0–59 months                   |              |         |            |                |            |         |            |                |                                             |
| Antibiotics for pneumonia                   | 9.5          | 7.8     | –1.7       | 0.5948         | 8.1        | 15.3    | 7.2        | 0.0752         | 0.2020                                      |
| Antimalarial for fever                      | 0.5          | 1.2     | 0.7        | 0.1344         | 1.0        | 3.1     | 2.1        | 0.0397         | 0.5700                                      |
| ORS for diarrhea                            | 3.5          | 6.7     | 3.2        | 0.0982         | 4.4        | 6.6     | 2.2        | 0.1896         | 0.3740                                      |
| Combined                                    | 4.8          | 5.0     | 0.2        | 0.8947         | 6.0        | 7.9     | 1.9        | 0.2278         | 0.6790                                      |
| Children aged 2–59 months                   |              |         |            |                |            |         |            |                |                                             |
| Antibiotics for pneumonia                   | 9.7          | 8.2     | –1.5       | 0.6823         | 7.9        | 15.7    | 7.8        | 0.0708         | 0.1950                                      |
| Antimalarial for fever                      | 0.5          | 1.2     | 0.7        | 0.1332         | 1.0        | 3.1     | 2.1        | 0.0404         | 0.5730                                      |
| ORS for diarrhea                            | 3.6          | 6.8     | 3.2        | 0.1083         | 4.5        | 6.7     | 2.3        | 0.1875         | 0.3820                                      |
| Combined                                    | 5.0          | 5.1     | 0.1        | 0.9569         | 6.0        | 8.0     | 2.1        | 0.2105         | 0.6260                                      |
| Treatment from private health facility      |              |         |            |                |            |         |            |                |                                             |
| Children aged 0–59 months                   |              |         |            |                |            |         |            |                |                                             |
| Antibiotics for pneumonia                   | 8.4          | 2.0     | –6.4       | 0.0146         | 9.2        | 4.6     | –4.6       | 0.0955         | 0.2130                                      |
| Antimalarial for fever                      | 0.9          | 0.1     | –0.8       | 0.0709         | 1.0        | 0.8     | –0.2       | 0.7446         | 0.1300                                      |
| ORS for diarrhea                            | 3.1          | 1.0     | –2.1       | 0.0710         | 1.5        | 3.8     | 2.3        | 0.1798         | 0.0480                                      |
| Combined                                    | 5.0          | 1.0     | –4         | 0.0000         | 4.8        | 3.8     | –1         | 0.4834         | 0.0250                                      |
| Children aged 2–59 months                   |              |         |            |                |            |         |            |                |                                             |
| Antibiotics for pneumonia                   | 8.5          | 2.2     | –6.3       | 0.0208         | 9.4        | 4.6     | –4.8       | 0.0854         | 0.2170                                      |
| Antimalarial for fever                      | 1.0          | 0.1     | –0.9       | 0.0711         | 1.0        | 0.8     | –0.2       | 0.7529         | 0.1310                                      |
| ORS for diarrhea                            | 3.2          | 1.0     | –2.2       | 0.0670         | 1.5        | 3.8     | 2.3        | 0.1758         | 0.0460                                      |
| Combined                                    | 5.2          | 1.1     | –4.1       | 0.0005         | 4.9        | 3.8     | –1.1       | 0.4709         | 0.0230                                      |
| Treatment from informal sources             |              |         |            |                |            |         |            |                |                                             |
| Children aged 0–59 months                   |              |         |            |                |            |         |            |                |                                             |
| Antibiotics for pneumonia                   | 10.1         | 2.9     | –7.2       | 0.0404         | 7.2        | 3.0     | –4.2       | 0.1399         | 0.8810                                      |
| Antimalarial for fever                      | 1.0          | 0.7     | –0.3       | 0.6820         | 0.4        | 0.5     | 0.1        | 0.7428         | 0.5470                                      |
| ORS for diarrhea                            | 1.9          | 1.6     | –0.3       | 0.8293         | 0.7        | 1.6     | 1.0        | 0.2151         | 0.1030                                      |
| Combined                                    | 5.7          | 1.5     | –4.2       | 0.0309         | 4.2        | 1.8     | –2.4       | 0.1424         | 0.5190                                      |
| Children aged 2–59 months                   |              |         |            |                |            |         |            |                |                                             |
| Antibiotics for pneumonia                   | 10.4         | 2.9     | –7.5       | 0.0369         | 7.5        | 3.1     | –4.4       | 0.1394         | 0.8850                                      |
| Antimalarial for fever                      | 1.0          | 0.8     | –0.3       | 0.6682         | 0.4        | 0.5     | 0.1        | 0.7622         | 0.5500                                      |
| ORS for diarrhea                            | 1.9          | 1.6     | –0.3       | 0.8239         | 0.4        | 1.6     | 1.2        | 0.0826         | 0.0500                                      |
| Combined                                    | 5.8          | 1.5     | –4.3       | 0.0290         | 4.2        | 1.8     | –2.4       | 0.1539         | 0.4860                                      |

ORS = oral rehydration salts.

SUPPLEMENTAL TABLE 7

Mortality rate among children under five and children aged 2–59 months by evaluation group

| Mortality rate                       | Baseline |     |            |            | Endline |     |            |              | Absolute difference (endline – baseline) |                   | Percent relative difference |
|--------------------------------------|----------|-----|------------|------------|---------|-----|------------|--------------|------------------------------------------|-------------------|-----------------------------|
|                                      | Value*   | SE† | 95% CI†    | Range‡     | Value*  | SE† | 95% CI†    | Range‡       | Value                                    | 95% CI            |                             |
| Under-five mortality rate            |          |     |            |            |         |     |            |              |                                          |                   |                             |
| Intervention group                   | 81.0     | 5.4 | 69.4–92.5  | 49.9–114.8 | 78.5    | 5.1 | 67.7–89.3  | (53.4–116.8) | –2.5                                     | –14.7–9.8         | –3.0                        |
| Comparison group                     | 76.7     | 6.6 | 62.6–90.8  | 35.6–109.8 | 70.3    | 5.5 | 58.6–82.0  | (44.1–109.8) | –6.4                                     | –23.6–10.8        | –8.3                        |
| Difference (comparison intervention) | –4.3     | 8.5 | –21.6–13.1 | –          | –8.2    | 7.4 | 23.4–7.0   | –            | <b>–3.9</b>                              | <b>–26.0–12.9</b> | –                           |
| Mortality among children 2–59 months |          |     |            |            |         |     |            |              |                                          |                   |                             |
| Intervention group                   | 49.0     | 5.3 | 37.8–60.3  | 22.8–90.5  | 42.8    | 3.9 | 34.6–51.1  | (19.0–76.9)  | –6.2                                     | –14.3–1.9         | –12.7                       |
| Comparison group                     | 45.0     | 4.0 | 36.5–53.5  | 12.4–64.9  | 40.9    | 2.9 | 34.6–47.2  | (25.6–64.9)  | –4.1                                     | –13.9–5.8         | –9.1                        |
| Difference (comparison intervention) | –4.1     | 6.7 | –17.7–9.6  | –          | –1.9    | 4.9 | –12.0–8.09 | –            | <b>2.1</b>                               | <b>–14.1–18.4</b> | –                           |

95% CI = 95% confidence interval; SE = standard error. Bold values are not statistically significant, judging by the 95% confidence intervals that do not include 0.

\*Based on average of U5MR across woredas.

†Based on *t* test.

‡Across 16 woredas in intervention areas and 15 woredas in comparison areas.

SUPPLEMENTAL TABLE 8  
Changes in selected other indicators

| Indicator                                                     | Intervention |         |            |                 | Comparison |         |            |                 | <i>P</i> value of difference in differences† |
|---------------------------------------------------------------|--------------|---------|------------|-----------------|------------|---------|------------|-----------------|----------------------------------------------|
|                                                               | Baseline     | Endline | Difference | <i>P</i> value* | Baseline   | Endline | Difference | <i>P</i> value* |                                              |
| ITN use by children under five                                | 12.7         | 10.6    | -2.1       | 0.5357          | 17.8       | 7.7     | -10.1      | 0.0356          | 0.3240                                       |
| Exclusive breast-feeding (0–6 months)                         | 33.8         | 60.1    | 26.3       | 0.0001          | 42.8       | 56.3    | 13.5       | 0.0169          | 0.1130                                       |
| Immunization (12–23 months)                                   |              |         |            |                 |            |         |            |                 |                                              |
| Measles (1+)                                                  | 64.4         | 38.1    | -26.3      | 0.0000          | 72.3       | 37.7    | -34.7      | 0.0000          | 0.2520                                       |
| Pentavalent (3+)                                              | 27.7         | 27.4    | -0.2       | 0.9608          | 26.8       | 25.7    | -1.1       | 0.8212          | 0.9330                                       |
| Pneumococcal (3+)                                             | 0.0          | 20.2    | 20.2       | 0.0000          | 0.0        | 17.2    | 17.2       | 0.0000          | 0.9980                                       |
| Vitamin A supplementation in previous 12 months (6–59 months) | 71.7         | 70.3    | -1.4       | 0.7556          | 80.0       | 65.9    | -14.2      | 0.0025          | 0.0030                                       |

Percentage based on woreda averages. ITN = insecticide treated net.

\*Based on *t* test across woreda averages.

†Based on Generalized mixed model with logit link.
